# Supplementary material
Source: PubMed Central journal article supplement (PMC5661288)
Supplement: ASN.2017010085SupplementaryData.pdf [file ASN.2017010085SupplementaryData.pdf]

## SUPPLEMENTAL MATERIAL

### ***Ets-1* Haploinsufficiency is Renoprotective in Dahl Salt-Sensitive Rats**

Wenguang Feng,<sup>1</sup> Bo Chen,<sup>4</sup> Dongqi D. Xing,<sup>2</sup> Xingsheng Li,<sup>1</sup> Huma Fatima,<sup>4</sup> Edgar A. Jaimes,<sup>5</sup> and Paul W. Sanders<sup>1,3,6</sup>

Division of Nephrology,<sup>1</sup> Division of Cardiovascular Disease,<sup>2</sup> Department of Medicine,  
Department of Cell, Developmental and Integrative Biology,<sup>3</sup>  
Department of Pathology,<sup>4</sup>

University of Alabama at Birmingham, Birmingham, AL, 35294-0007

Renal Service, Memorial Sloan Kettering Cancer Center,<sup>5</sup> New York, NY, 10065

and

Department of Veterans Affairs Medical Center,<sup>6</sup> Birmingham, AL, 35233

**Table S1. PCR primers covered the potential ETS-1 binding sites in MCP-1 promoter for ChIP assay**

|       | Forward primers          | Reverse primers          |
|-------|--------------------------|--------------------------|
| ChIP1 | CCAGGTATCTTCTCCCTTAGGACT | GTGGAAGTTTGAATCTGCTGAGTA |
| ChIP2 | CTAACCTGGAAGGCTGAGTTAAG  | GAGAGACATTCCTTTTGATTTGGT |
| ChIP3 | CAGTCACTGTCTCCATGACTCTCT | TGATCAAAGCCATAAAATCTGAAA |
| ChIP4 | ACATGAATCCTCACCTTTTGACAT | TTCTATGTGAGGAAGCCTATTTCC |
| ChIP5 | GAGAGTAGAGGGTAGCTGTTGGAG | CAGAGTCAGAGTGGGAGAAAGAAG |
| ChIP6 | GCTGCAAGTGACTCTCTTTCT    | AAATTCTGAGCCATTCTTTCTCC  |
| ChIP7 | GTTTTTCCACACTGGGCAACT    | GGGGCTTGTCACTATATTGTCTTC |

Figure S1

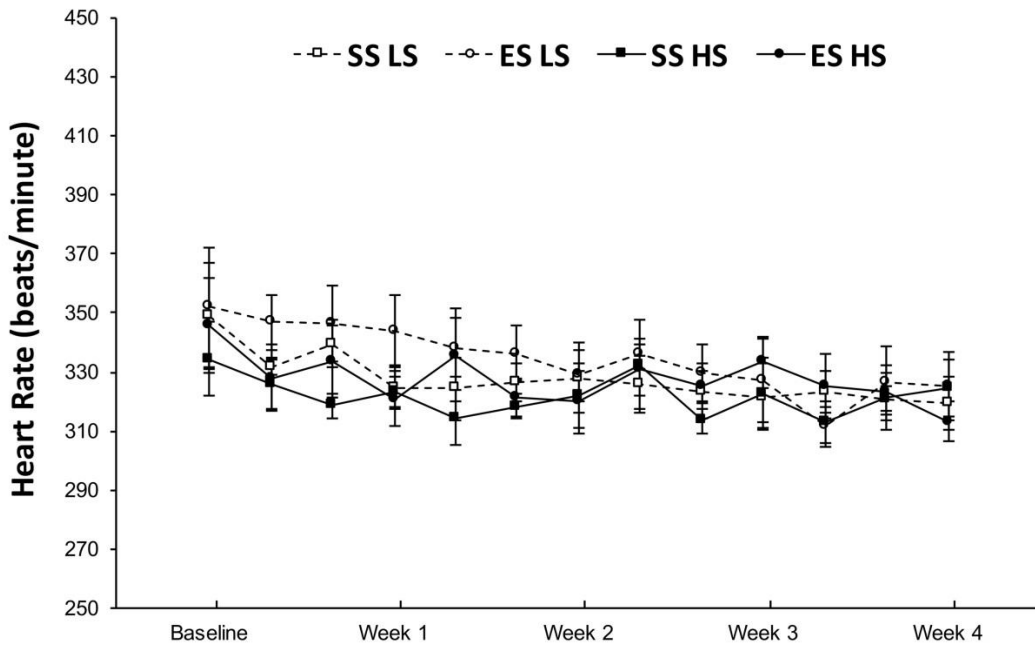

Figure S1. Heart rates did not differ between SS and ES rats, during either high salt (HS) or low salt (LS) intake.

Figure S2

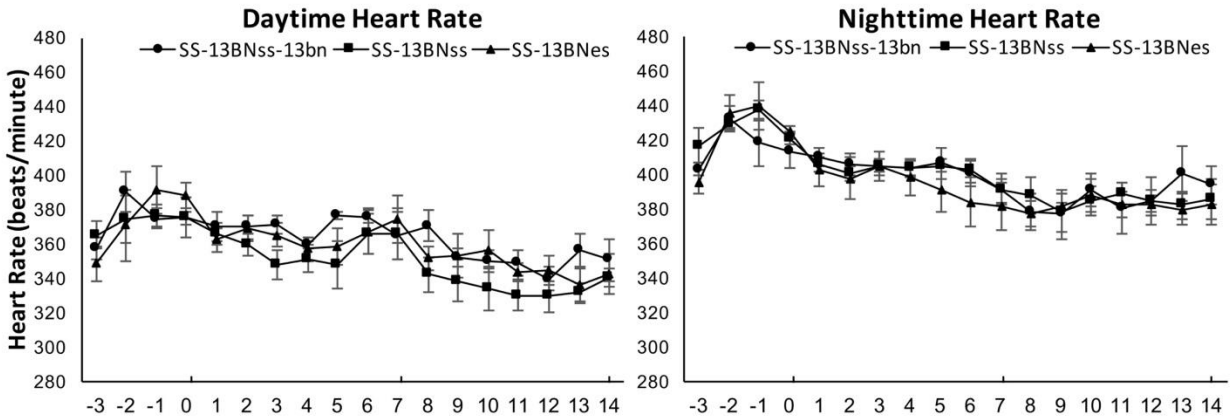

Figure S2. Daytime (left) or nighttime (right) heart rates did not differ among three groups of kidney-transplanted rats, SS-13BNss-13bn, SS-13BNss and SS-13BNes rats, during either high salt or low salt intake.
